# Supplementary material
Source: PubMed Central journal article supplement (PMC1413914)

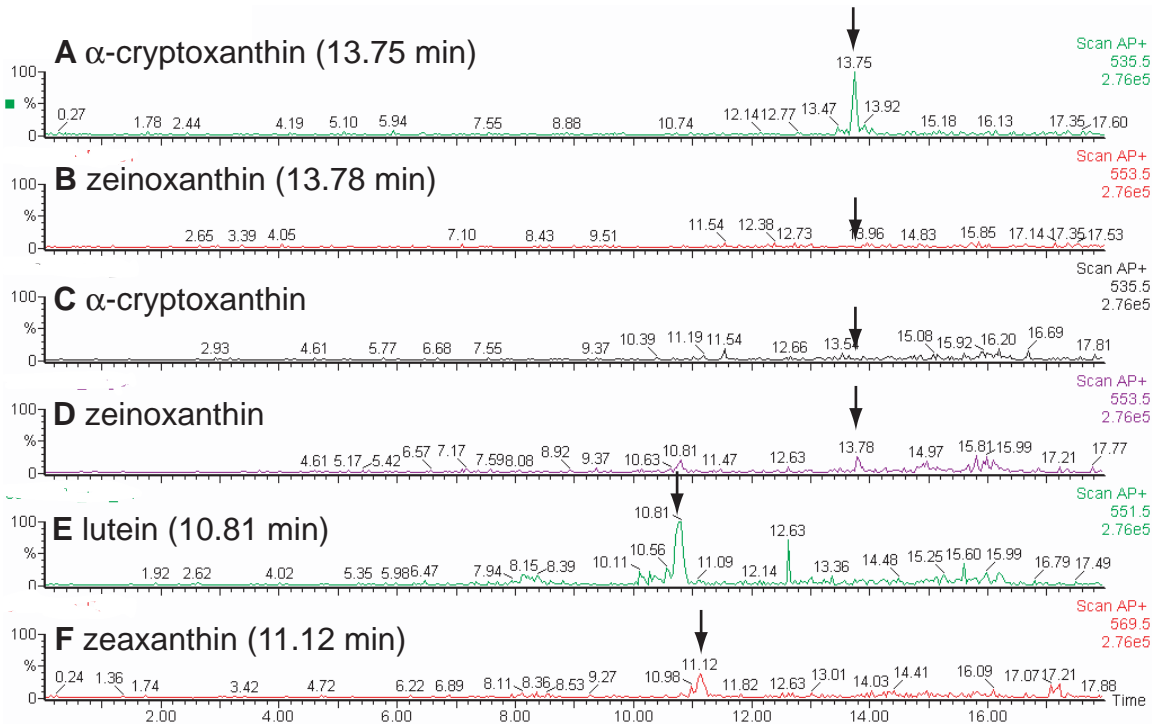

Supplement: pnas_0511207103_1.pdf [file pnas_0511207103_1.pdf]
